# Supplementary material for: Childhood Predictors of Cluster A Personality Disorder Traits in Adolescence: A Seven-Wave Birth Cohort Study
Source: Research Square preprint supplement (doi:10.21203/rs.3.rs-6374300/v1), 2025-08-01
Supplement: Supplementary file 1 [file 571e83d6e6d8a38f21c647f6.docx]

**Measures of predictors**

**Oddity.** Following de Clercq et al.,1 seven items from the attention and thought problems scales of the Child Behavior Checklist (e.g., “Sees things that aren’t there”, “Strange ideas”, Daydreams or gets lost in his/her thoughts”) completed by parents at ages 6-14 were averaged to make a composite measure oddity (α=.55-.71).

**Executive Functioning**. The teacher who knew the child best completed the Behavior Rating Inventory of Executive Functions (BRIEF), 2 which assesses key executive functions, including inhibition, cognitive flexibility, working memory, planning/organizing, emotional control, initiation, organization of materials, and monitoring. The total score was used (α=.98 at all ages).

**Imaginary Companion.** At ages 4 and 6, parents were interviewed about their child and asked, “Does X have an imaginary friend?” (scored No/Yes) with follow-up questions ensuring the imaginary friend was consistently described and not based on a misunderstanding.

**Self-esteem***.* To assess global self-esteem, the Self-Description Questionnaire I (SDQ-I)3 was administered to children at ages 6, 8, and 10, containing eight items that are rated on a 5-point Likert scale (1=*wrong* to5=*true;* α=.82-.87). At ages 12 and 14, self-esteem was assessed using the age-appropriate Global Self-Worth Scale of the SPPA-R, which includes five items rated on a 4-point Likert scale (SPPA-R; *α*=.79-.84)4,5 ranging from 1=“*describes me very poorly*” to 4=“*describes me very well*.”

**Personality Traits**. Children completed the Norwegian version of the self-reported Big Five Inventory (BFI) at ages 10-14, measuring Conscientiousness (α=.65-.77), Agreeableness (α=.64-.72), Neuroticism (α=.59-.81), Extraversion (α=.54-.75), and Openness (α=.70-.74).6

**Emotion Regulation.** The teacher who knew the child best completed the Emotion Regulation Checklist (ERC) at ages 6-14. The checklist comprises two subscales: Emotion Regulation and Lability/Negativity. Because the authors judged the Lability/Negativity subscale to capture constructs closer to personality, which is already captured by the BFI, only the Emotion Regulation subscale (8 items; α=.64-.74) was used, tapping the presence of positive emotions (e.g., “Is a cheerful child”), interpersonal emotional interest (e.g., “is empathic towards others”), absence of negative emotions (e.g., ‘seems sad or listless’) and restricted emotional expression (e.g., ‘displays flat affect’).

**Social Skills**. Teachers completed the 30-item Social Skills Rating System (SSRS)8 at ages 4-10, measuring assertion, self-control, and cooperation (α =.89-.93). At ages 12-14, the Social Skills Improvement System,9 an updated version of the SSRS that also measures communication, empathy, and engagement, was used (α=.96).

**Social Withdrawal.** Teachers completed the Conflicted Shyness subscale of the Child Social Preference Scale at ages 6-14, 10 which taps approach-avoidance conflict in peer relations with items such as “The child circles other children’s play without participating” (α=.82-.89).

**Attachment. *Ages 4 and 6: The Manchester Child Attachment Story Task (MCAST).*** The MCAST is suitable for children aged 4-811 and is set up as a doll-play completion task involving one doll representing the child and one doll representing the parent who accompanied the child to the assessment. Four vignettes are included, which begin with everyday/neutral events followed by a sudden and distressing event (e.g., is alone when waking up from a nightmare in the middle of the night). As the story climaxes, the administrator asks, “What happens next?” to facilitate the completion of the child’s narrative. The child is then asked about the feelings experienced by the child and the parent doll.

The child’s narrative and behavior in each vignette are assigned a primary attachment strategy (A, B, C, or D) and a secondary strategy if relevant. A mean score of attachment across the four vignettes was created.12 Here, we used the secure attachment and disorganized attachment scores. All MCAST assessments were videotaped for later coding. A subset of 157 videos from ages 4 and 6 were randomly selected and recoded by blinded coders (secure attachment ICC=.84; disorganized attachment ICC=.74).

***Ages 10, 12 and 14: Middle Childhood Attachment Strategies Coding System (MCAS).*** In line with the MCAS procedure,13 each child and one parent were videotaped while engaging in structured interaction tasks. The parent and the child were asked to identify and agree on the most important area they disagreed on and then discuss it for 8 minutes. The dyads were free to choose a topic on their own but were given an age-appropriate list of topics that parents and children often disagree on (e.g., chores, bedtimes, screen use, homework, and clothing).

Grounded in the secure base concept, the MCAS evaluates behavioral indicators of four attachment strategies identified in infancy (secure, avoidant, ambivalent, and disorganized-disoriented).A 9-point rating scale is used, ranging from 1=*one or slight/isolated minor evidence of a specific pattern that does not characterize the child’s behavior and interaction overall* to 9=*marked and persistent evidence of a specific pattern that predominantly characterizes the child’s behavior and interaction*. A total of 315 videos from ages 10-14 were randomly selected and recoded by blinded raters (secure attachment ICC=.71; disorganized attachment ICC=.66).

**Symptoms of Psychiatric Disorders.** Parents were interviewed with thePreschool Age Psychiatric Assessment (PAPA)14 at ages 4-6 years, and parents and children were interviewed separately with the Child and Adolescent Psychiatric Assessment (CAPA)15 at ages 8-14. Both interviews contain mandatory questions and optional follow-ups, and interviewers continue to probe until a decision can be made regarding whether a symptom is present. A 3-month primary period was employed, and symptom onset, duration, and intensity were recorded. A symptom was considered present if it was reported by either the child or the parent. The number of symptoms of major depressive disorder, dysthymia, separation anxiety, social anxiety, and generalized anxiety disorder, and the number of specific phobia disorders were summed to form a measure of symptoms of emotional disorders, and the number of symptoms of oppositional defiant and conduct disorder were summed to make a measure of symptoms of behavioral disorders. Blinded coders recoded 88 PAPA and 279 CAPA interviews, yielding interrater reliabilities (ICC) of .86 and .82, respectively, for symptoms of emotional disorders and .90 and .83 for symptoms of behavioral disorders. The PAPA (but not the CAPA) includes 28 items assessing the B-criteria for autism spectrum disorder and four items for the A-criteria. A composite score of these items was created at ages 4 and 6 (ICC = .83).

**Serious Negative Life Events.**  Parents and children (from age 8) reported whether the child had experienced any of 26 events, including the death of a loved adult, a severe fall, witnessing violence or death, or being subjected to physical and/or sexual abuse during the preceding two years. An event was considered present if reported by either the child or the parent.

**Bullying Victimization.**The child’s primary teacher completed the 5-item Olweus Bully Victim Questionnaire (OBVQ)16at 6 to 14 years of age to assess both direct and indirect forms of bullying during the previous 3 months. Items are rated on a 5-point Likert scale (1=*never*, 2=*rarely*, 3=*1-3 times a month*, 4=*1-4 times a week*, and 5=*every day*). Midpoint values were used to estimate the frequency of bullying per month.

**Parental Personality Disorder Traits.** Parental personality disorder traits were assessed using the DSM-IV and ICD-10 Personality Questionnaire,17 a self-report questionnaire. It was completed by the parents when the participating children were 4, 6, and 14. A composite score was created for each personality disorder cluster (A, B, and C; θ = .88–.95).

**Supplementary Table 1.** *Sample Characteristics (%) of Participants at the Time of Study Enrollment (T1).*

| Characteristic |  | % |
| --- | --- | --- |
| Sex of child | Male | 49.1 |
|  | Female | 50.9 |
| Sex of parent informant | Male | 15.2 |
|  | Female | 84.8 |
| Ethnic origin of biological mother | Norwegian | 93.0 |
|  | Western countries | 2.7 |
|  | Other countries | 4.3 |
| Ethnic origin of biological father | Norwegian | 91.0 |
|  | Western countries | 5.8 |
|  | Other countries | 3.2 |
| Biological parents’ marital status | Married | 56.3 |
|  | Cohabitating >6 months | 32.6 |
|  | Separated | 1.7 |
|  | Divorced | 6.8 |
|  | Widowed | 0.2 |
|  | Cohabitating <6 months | 1.1 |
|  | Never lived together | 1.3 |
| Informant parent’s occupational level | Leader | 5.7 |
|  | Professional, higher level | 25.7 |
|  | Professional, lower level | 39.0 |
|  | Formally skilled worker | 26.0 |
|  | Farmer/fisherman | 0.5 |
|  | Unskilled worker | 3.1 |
| Parent’s highest completed education | Did not complete junior high school | 0.0 |
|  | Junior high school (10th grade) | 0.6 |
|  | Some educational after junior high school | 6.1 |
|  | Senior high school (13th grade) | 17.3 |
|  | Some education after senior high school | 3.4 |
|  | Some college or university education | 7.6 |
|  | Bachelor’s degree | 6.2 |
|  | College degree (3-4 years study) | 33.6 |
|  | Master’s degree or similar | 20.3 |
|  | PhD completed or ongoing | 4.4 |
| Households’ gross annual income | 0-225´ NOK (0-21´ USD) | 3.3 |
|  | 225´-525´ NOK (21´-49´ USD) | 18.4 |
|  | 525´-900´ NOK (49´-85´ USD) | 51.6 |
|  | 900´+ NOK (85´+ USD) | 26.7 |

**Supplementary Table 2.** *Descriptive of the Growth Parameters of Predictors of Cluster A Traits*

|  |  | Growth parameters | | | Model fit | | | | |
| --- | --- | --- | --- | --- | --- | --- | --- | --- | --- |
| Predictor (age range in years) | *n* | Inter-cept | Slope | *p*-value Slope | χ2 | *df* | *p-*value | CFI | RMSEA  (90% CI) |
| Child factors | | | | | | | | | |
| Odditya(4-14) | 956 | 1.04 | 0.00 | .367 | 12.20 | 10 | .272 | .980 | .020(.000, .038) |
| Executive functioning problemsa (6-14) | 851 | 88.28 | -0.11 | .33 | 38.54 | 10 | .006 | .948 | .059(.041, .079) |
| Imaginary friend (4-6) | 1004 | 0.20 | -0.01 | .475 |  |  |  | N.A. |  |
| Self-esteem (8-14) | 808 | 5.02 | 0.01 | <.001 | 9.86 | 6 | .131 | .983 | .028(.000, .059) |
| Opennessa (10-14) | 719 | 3.78 | -0.07 | <.001 | 1.10 | 1 | .295 | 1.000 | .012(.000, .100) |
| Conscientiousnessa (10-14) | 719 | 3.67 | -0.02 | .003 | 10.78 | 1 | .001 | .971 | .117(.061, .184) |
| Agreeablenessa (10-14) | 719 | 4.18 | -0.04 | <.001 | 2.29 | 1 | .130 | .994 | .042(.000, .118) |
| Extroversiona (10-14) | 719 | 3.60 | 0.01 | .249 | 4.76 | 1 | .029 | .988 | .072(.019, .143) |
| Neuroticisma (10-14) | 719 | 2.51 | -0.02 | .041 | 10.24 | 1 | .001 | .965 | .113(.058, .181) |
| Emotion regulationb (6-14) | 850 | 3.37 | -0.03 | <.001 | 34.44 | 7 | <.001 | .912 | .068(.046, .091) |
| Social-relational and environmental factors | | | | | | | | | |
| Social competenceb (4-14) | 998 | 13.59 | 0.07 | <.001 | 53.00 | 11 | <.001 | .947 | .062(.046, .079) |
| Social withdrawalb (6-14) | 851 | 44.80 | -0.01 | .310 | 24.43 | 7 | .001 | .932 | .054(.032, .078) |
| Secure attachmentb (4-14) | 953 | 0.52 | 0.18 | <.001 | 14.32 | 9 | .111 | .830 | .025(.000, .048) |
| Disorganized attachment(4-14) | 953 | 0.19 | 0.10 | <.001 | 6.38 | 7 | .496 | 1.00 | .000(.000, .038) |
| Negative lifeeventsb (4-14) | 1068 | .73 | -0.03 | <.001 | 9.68 | 9 | .377 | .996 | .009(.000, .037) |
| Victimization from bullyingb (8-16) | 850 | 4.57 | -0.24 | .001 | 8.29 | 7 | .310 | .941 | .015(.000, .046) |
| Parental cluster A symptomsa (4,6,14) | 953 | .92 | -0.01 | .226 | .61 | 1 | .436 | 1.000 | .000(.000, .078) |
| Parentalcluster B symptomsa (4,6,14) | 953 | 1.25 | -0.01 | <.001 | .65 | 1 | .421 | 1.000 | .000(.000, .079) |
| Parental cluster C symptomsa (4,6,14) | 953 | 1.48 | -0.01 | <.001 | .02 | 1 | .896 | 1.000 | .000(.000, .039) |
| Psychopathology | | | | | | | | | |
| Emotional disorder symptomsa (6-14) | 1040 | 6.16 | 0.38 | <.001 | 22.00 | 16 | .143 | .988 | .019(.000to.037) |
| Behavioral disorder symptomsa (6-14) | 1040 | 5.45 | 0.00 | .932 | 41.94 | 15 | <.001 | .946 | .042(.027to.057) |
| Autism spectrum symptomsa (4-6) | 1036 | 1.07 | -0.01 | .834 | N.A. | | | | |

*Note:* aLinear growth model, bLatent basis growth models. CFI=Comparative Fit Index, RMSEA=Root Mean Square Error of Approximation, CI=confidence interval, N.A.=Not applicable.

**References**

1. De Clercq B, Verbeke L, De Caluwé E, Vercruysse T, Hofmans J. Understanding adolescent personality pathology from growth trajectories of childhood oddity. *Dev Psychopathol*. Oct 2017;29(4):1403-1411. doi:10.1017/s0954579417000347

2. Gioia GA, Isquith PK, Guy SC, Kenworthy L. Behavior Rating Inventory of Executive Function. *Child Neuropsychology*. 2000;6(3):235-238. doi:10.1076/chin.6.3.235.3152

3. Marsh HW, Barnes J, Cairns L, Tidman M. Self-description questionnaire: Age and sex effects in the structure and level of self-concept for preadolescent children. *Journal of Educational Psychology*. 1984;76(5):940–956. doi:10.1037/0022-0663.76.5.940

4. Harter S. *Manual for the self-perception profile for adolescents*. University of Denver; 1988.

5. Wichstrøm L. Harters Self-Perception Profile for Adolescents - Reliability, Validity, and Evaluation of the Question Format. *J Pers Assess*. AUG 1995;65(1):100-116.

6. Soto CJ, John OP, Gosling SD, Potter J. The developmental psychometrics of big five self-reports: Acquiescence, factor structure, coherence, and differentiation from ages 10 to 20. *J Pers Soc Psychol*. Apr 2008;94(4):718-737. doi:10.1037/0022-3514.94.4.718

7. Shields A, Cicchetti D. Emotion regulation among school-age children: The development and validation of a new criterion Q-sort scale. *Developmental Psychology*. Nov 1997;33(6):906-916.

8. Gresham FM, Elliot SN. *Social Skills Rating System*. American Guidance Service; 1990.

9. Gresham FM, Elliott SN, Vance MJ, Cook CR. Comparability of the Social Skills Rating System to the Social Skills Improvement System: Content and Psychometric Comparisons Across Elementary and Secondary Age Levels. *Sch Psychol Q*. Mar 2011;26(1):27-44. doi:10.1037/a0022662

10. Coplan RJ, Prakash K, O'Neil K, Armer M. Do you "want" to play? Distinguishing between conflicted shyness and social disinterest in early childhood. *Developmental Psychology*. Mar 2004;40(2):244-258. doi:10.1037/0012-1649.40.2.244

11. Green JM, Stanley C, Smith V, Goldwyn R. A new method for evaluating attachment representations in young school-age children: The Manchester Child Attachment Story Task. *Attachment & Human Development*. 2000;2:48-70.

12. Viddal KR, Berg-Nielsen TS, Belsky J, Wichstrom L. Change in Attachment Predicts Change in Emotion Regulation Particularly Among 5-HTTLPR Short-Allele Homozygotes. Article. *Developmental Psychology*. Jul 2017;53(7):1316-1329. doi:10.1037/dev0000321

13. Brumariu LE, Giuseppone KR, Kerns KA, et al. Middle Childhood Attachment Strategies: validation of an observational measure. Article. *Attachment & Human Development*. 2018;20(5):491-513. doi:10.1080/14616734.2018.1433696

14. Egger HL, Erkanli A, Keeler G, Potts E, Walter BK, Angold A. Test-retest reliability of the Preschool Age Psychiatric Assessment (PAPA). *J Am Acad Child Adolesc Psychiatry*. May 2006;45(5):538-549.

15. Angold A, Costello EJ. The Child and Adolescent Psychiatric Assessment (CAPA). *J Am Acad Child Adolesc Psychiatry*. JAN 2000;39(1):39-48.

16. Solberg ME, Olweus D. Prevalence estimation of school bullying with the olweus bully/victim questionnaire. *Aggressive Behavior*. 2003/04/22 2003;29(3):239–268. doi:10.1002/ab.10047

17. Ottosson H, Bodlund O, Ekselius L, et al. DSM-IV and ICD-10 personality disorders: a comparison of a self-report questionnaire (DIP-Q) with a structured interview. Article. *Eur Psychiatry*. 1998;13(5):246-253. doi:10.1016/s0924-9338(98)80013-8
